35. Wrigge H, Zinserling J, Stüber F, von Spiegel T, Hering R, Wetegrove S, Hoeft A, Putensen C: Effects of mechanical ventilation on release of cytokines into systemic circulation in patients with normal pulmonary function. *ANESTHESIOLOGY* 2000; 93:1413–7
36. Higgins BD, Costello J, Contreras M, Hassett P, O' Toole D, Laffey JG: Differential effects of buffered hypercapnia *versus* hypercapnic acidosis on shock and lung injury induced by systemic sepsis. *ANESTHESIOLOGY* 2009; 111:1317–26
37. Gao J, Zeng BX, Zhou LJ, Yuan SY: Protective effects of early treatment with propofol on endotoxin-induced acute lung injury in rats. *Br J Anaesth* 2004; 92:277–9
38. Chen HI, Hsieh NK, Kao SJ, Su CF: Protective effects of propofol on acute lung injury induced by oleic acid in conscious rats. *Crit Care Med* 2008; 36:1214–21
39. Balyasnikova IV, Visintine DJ, Gunnerson HB, Paisansathan C, Baughman VL, Minshall RJ, Danilov SM: Propofol attenuates lung endothelial injury induced by ischemia-reperfusion and oxidative stress. *Anesth Analg* 2005; 100:929–36
40. Sticher J, Müller M, Scholz S, Schindler E, Hempelmann G: Controlled hypercapnia during one-lung ventilation in patients undergoing pulmonary resection. *Acta Anaesthesiol Scand* 2001; 45:842–7
41. Roupie E, Dambrosio M, Servillo G, Mentec H, el Atrous S, Beydon L, Brun-Buisson C, Lemaire F, Brochard L: Titration of tidal volume and induced hypercapnia in acute respiratory distress syndrome. *Am J Respir Crit Care Med* 1995; 152:121–8
42. De Conno E, Steurer MP, Wittlinger M, Zalunardo MP, Weder W, Schneiter D, Schimmer RC, Klaghofer R, Neff TA, Schmid ER, Spahn DR, Z'graggen BR, Urner M, Beck-Schimmer B: Anesthetic-induced improvement of the inflammatory response to one-lung ventilation. *ANESTHESIOLOGY* 2009; 110:1316–26

## ANESTHESIOLOGY REFLECTIONS FROM THE WOOD LIBRARY-MUSEUM

### Capitol Hill Bill: “Tom Morton” Cigar Box Label, Part II

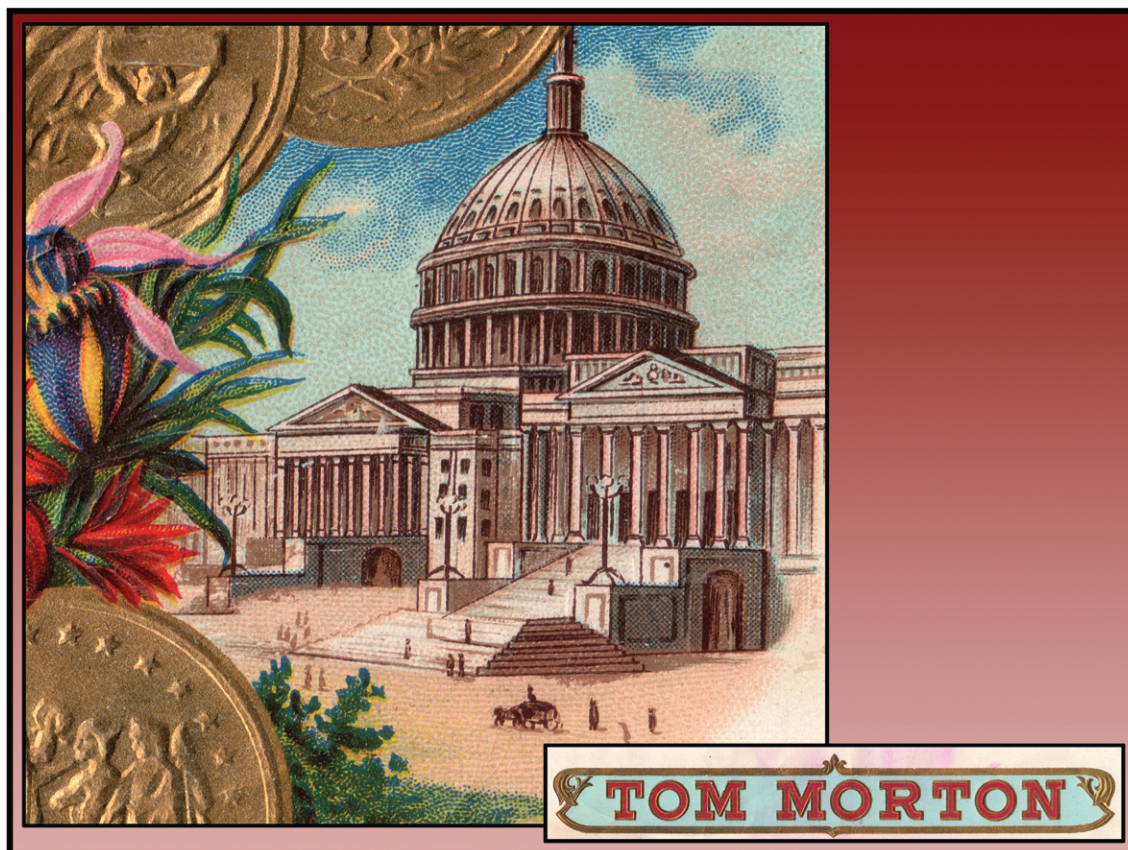

The right side of the “Tom Morton” cigar box label featured the U.S. Capitol Building (*above*). Never nicknamed “Tom,” perhaps ether pioneer William Thomas Green Morton (WTGM) should have been dubbed “Capitol Hill Bill” for all of the efforts by his advocates and himself to persuade the U.S. Congress to pass a “Capitol Hill bill.” Such a bill would have aimed to reward WTGM monetarily for popularizing ether as a general anesthetic. Lithographs of the faces of both WTGM and the Capitol Building were conveniently available to the Wisconsin printers (the Henschel Family) of this label. However, since WTGM’s friends referred to the etherist as “Willie” but never as “Tom,” linking a cigar called “Tom Morton” to WTGM seems a clumsy advertisement for reaching the smoking public. (Copyright © the American Society of Anesthesiologists, Inc.)

George S. Bause, M.D., M.P.H., Honorary Curator, ASA’s Wood Library-Museum of Anesthesiology, Schaumburg, Illinois, and Clinical Associate Professor, Case Western Reserve University, Cleveland, Ohio. [UJYC@aol.com](mailto:UJYC@aol.com).
